# Supplementary material
Source: PubMed Central journal article supplement (PMC8967611)
Supplement: 7702_3_supp_95414_r1x6bg.pdf [file 7702_3_supp_95414_r1x6bg.pdf]

## **Supplemental Information**

### **Excretion Patterns of Urinary Sediment and Supernatant Podocyte Biomarkers in Patients with Chronic Kidney Disease**

<sup>1,2</sup>Akihiro Fukuda, <sup>2</sup>Akihiro Minakawa, <sup>2</sup>Yuji Sato, <sup>1</sup>Hiroataka Shibata, <sup>3</sup>Masanori Hara, <sup>2</sup>Shouichi

Fujimoto

<sup>1</sup>Department of Endocrinology, Metabolism, Rheumatology and Nephrology, Faculty of Medicine, Oita University, Yufu, Japan

<sup>2</sup>Division of Nephrology, Department of Internal Medicine, Faculty of Medicine, University of Miyazaki, Miyazaki, Japan

<sup>3</sup>Iwamuro Health Promotion Center, Niigata, Japan

#### **Table of Contents**

**Supplemental Figure S1. Relationship between urinary podocyte markers and proteinuria in patients with MCNS.**

**Supplemental Table S1. Clinical parameters, urinary podocyte markers, with or without relapse, and use of immunosuppressive drugs in patients with MCNS.**

**Supplemental Figure S1.****Relationship between urinary podocyte markers and proteinuria in patients with MCNS.**

(A) Relationship between u-sed Pod mRNA excretion and proteinuria.

(B) Relationship between u-sup PCX protein and proteinuria.

U-sed Pod mRNA excretion, but not u-sup PCX protein, was significantly correlated with proteinuria

(U-sed Pod mRNA excretion:  $n = 15$ ,  $r = 0.61$ ,  $p = 0.02$ ; U-sup PCX protein:  $n = 15$ ,  $r = -0.25$ ,  $p = 0.37$ ).

## Supplemental Figure S1.

## Minimal change nephrotic syndrome

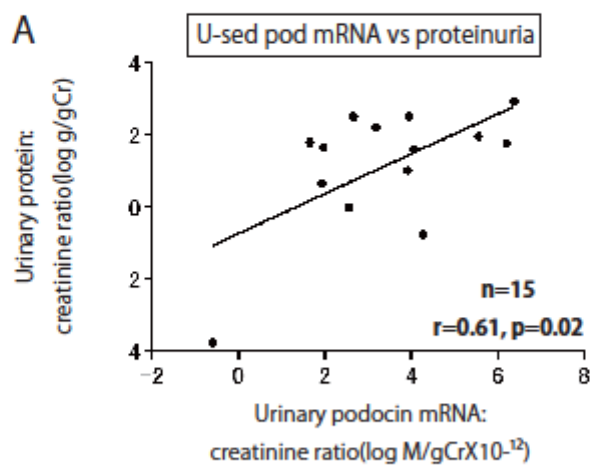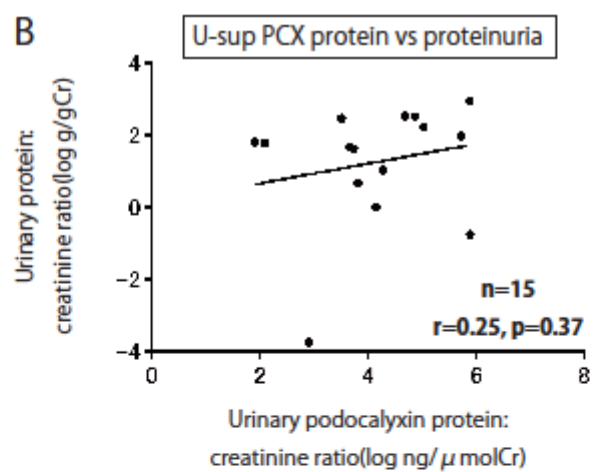

**Supplemental Table S1.**

**Clinical parameters, urinary podocyte markers, with/without relapse, and use of immunosuppressive drugs in patients with MCNS**

| Pt No | Sex | Age | e-GFR                        | SBP    | DBP    | TP     | Alb    | U-Pro/Cre | logPodCR | logPCX | relapse | Immunosuppressive |
|-------|-----|-----|------------------------------|--------|--------|--------|--------|-----------|----------|--------|---------|-------------------|
|       |     |     | (mL/min/1.73m <sup>2</sup> ) | (mmHg) | (mmHg) | (g/dL) | (g/dL) | (g/gCr)   |          |        |         | drug              |
| 1     | F   | 59  | 54.5                         | 143    | 86     | 3.93   | 1.29   | 7.17      | 5.55     | 5.71   | -       | -                 |
| 2     | M   | 22  | 104.9                        | 136    | 82     | 4.03   | 1.41   | 1.00      | 2.56     | 4.15   | -       | PSL               |
| 3     | M   | 52  | 62.4                         | 106    | 61     | 4.58   | 1.32   | 5.03      | 4.06     | 3.73   | +       | -                 |
| 4     | F   | 72  | 23.7                         | 60     | 42     | 4.37   | 1.21   | 18.86     | 6.37     | 5.88   | -       | PSL               |
| 5     | F   | 71  | 29.7                         | 105    | 62     | 3.99   | 1.05   | 9.21      | 3.18     | 5.02   | -       | -                 |
| 6     | F   | 50  | 66.8                         | 132    | 79     | 3.54   | 1.31   | 2.77      | 3.92     | 4.27   | +       | -                 |
| 7     | M   | 35  | 59.4                         | 135    | 85     | 4.28   | 1.79   | 12.41     | 2.67     | 4.87   | +       | -                 |
| 8     | F   | 77  | 27.9                         | 99     | 52     | 4.5    | 1.61   | 6.07      | 1.66     | 1.91   | -       | -                 |
| 9     | F   | 64  | 60.4                         | 135    | 84     | 3.87   | 1.38   | 11.69     | N/A      | 3.51   | +       | PSL, MZR          |
| 10    | M   | 67  | 67.6                         | 94     | 59     | 6.17   | 1.97   | 0.47      | 4.27     | 5.89   | +       | PSL               |
| 11    | M   | 71  | 9.2                          | 150    | 76     | 4.82   | 1.51   | 12.52     | 3.94     | 4.68   | +       | -                 |
| 12    | M   | 67  | 32.1                         | 110    | 77     | 4.47   | 1.6    | 5.26      | 1.97     | 3.66   | +       | -                 |
| 13    | F   | 28  | 98.1                         | 111    | 80     | 3.89   | 1.76   | 1.94      | 1.94     | 3.82   | +       | PSL, TAC          |
| 14    | M   | 36  | 59.0                         | 135    | 85     | 4.28   | 1.79   | 0.02      | -0.59    | 2.90   | +       | PSL               |
| 15    | F   | 46  | 19.2                         | 139    | 73     | 3.8    | 1.25   | 5.89      | 6.20     | 2.09   | +       | -                 |

PSL, prednisolone; MZR, mizoribine; TAC, tacrolimus
